# Supplementary material for: Essential Oils and Supercritical CO2 Extracts of Arctic Angelica (Angelica archangelica L.), Marsh Labrador Tea (Rhododendron tomentosum) and Common Tansy (Tanacetum vulgare)—Chemical Compositions and Antimicrobial Activities
Source: MDPI journal article supplement (doi:10.3390/molecules26237121), 2021-11-25
Supplement: s1 [file s1]

Supplementary data

# Essential Oils and Supercritical CO<sub>2</sub> Extracts of Arctic Angelica (*Angelica archangelica* L.), Marsh Labrador Tea (*Rhododendron tomentosum*) and Common Tansy (*Tanacetum vulgare*)—Chemical Compositions and Antimicrobial Activities

Risto I. Korpinen <sup>1,2</sup>, Anna-Liisa Välimaa <sup>3</sup>, Jaana Liimatainen <sup>1</sup>, and Susan Kunnas <sup>4,\*</sup>

<sup>1</sup> Natural Resources Institute Finland, Production Systems, Tietotie 2, 02150 Espoo, Finland; risto.korpinen@luke.fi (R.I.K.); jaana.liimatainen@luke.fi (J.L.)

<sup>2</sup> LUT University, LUT School of Engineering Science, Separation Science, Yliopistonkatu 34, 53850 Lappeenranta, Finland

<sup>3</sup> Natural Resources Institute Finland, Production Systems, Paavo Havaksentie 3, 90570 Oulu, Finland; anna-liisa.valimaa@luke.fi (A.-L.V.)

<sup>4</sup> Natural Resources Institute Finland, Production Systems, Ounasjoentie 6, 96200 Rovaniemi, Finland; susan.kunnas@luke.fi (S.K.)

\* Correspondence: susan.kunnas@luke.fi; Tel.: +358-295325299

The selected obtained chromatograms of the studied EOs and scCO<sub>2</sub> extracts are shown in Figures S1–S12.

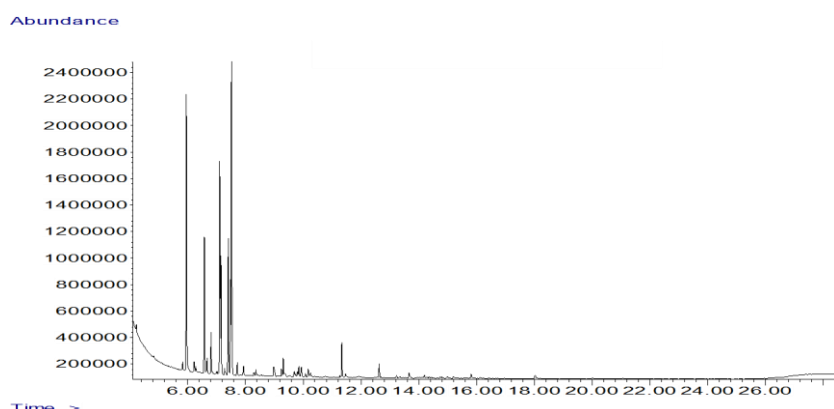

**Figure S1.** Chromatogram of air-dried Angelica root EO.

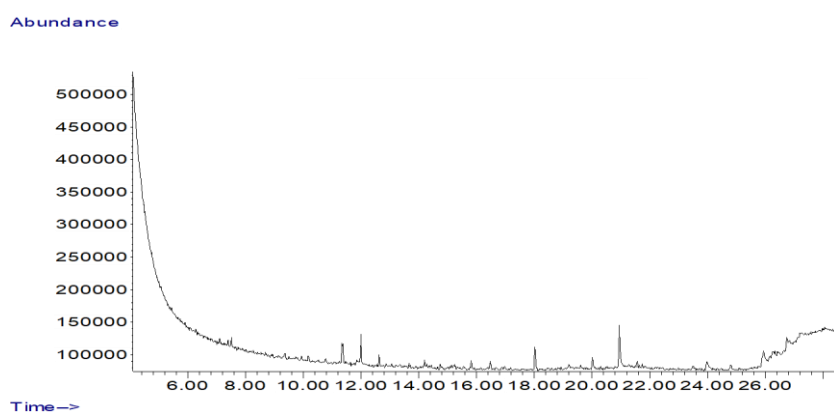

**Figure S2.** Chromatogram of air-dried Angelica root scCO<sub>2</sub> extract.

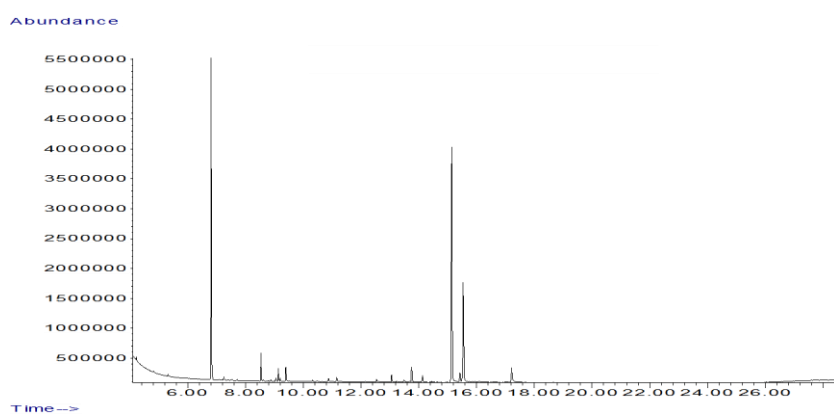

**Figure S3.** Chromatogram of air-dried marsh Labrador tea EO.

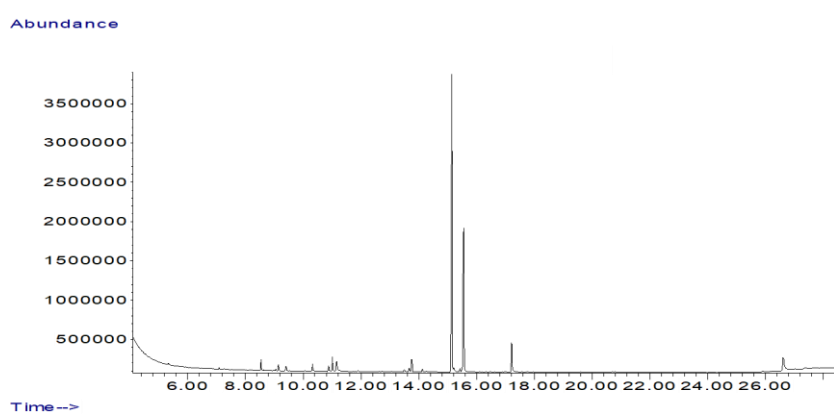

**Figure S4.** Chromatogram of air-dried marsh Labrador tea scCO<sub>2</sub> extract.

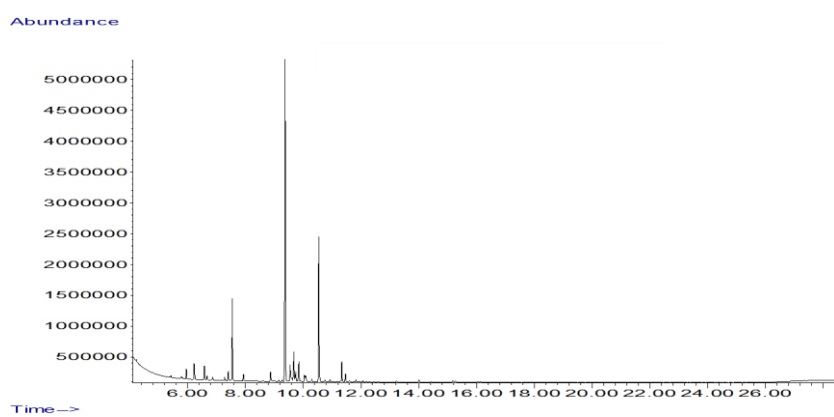

**Figure S5.** Chromatogram of air-dried common tansy inflorescence EO.

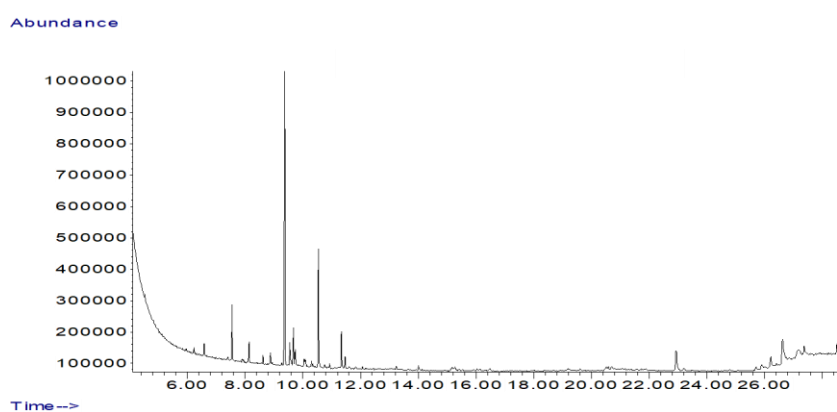

**Figure S6.** Chromatogram of air-dried common tansy inflorescence scCO<sub>2</sub> extract.

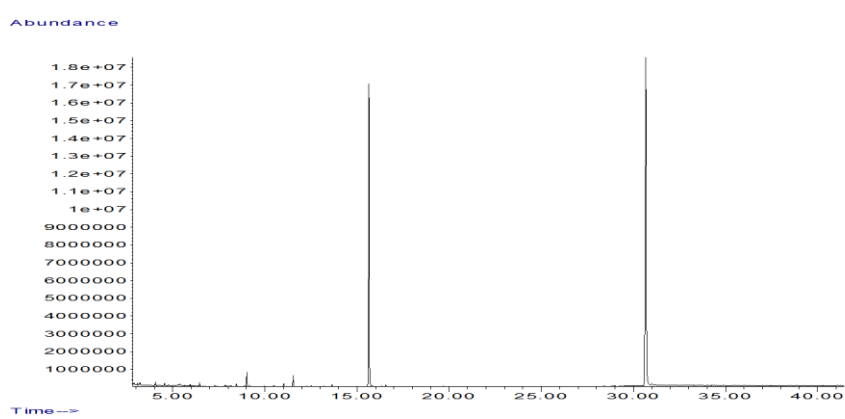

**Figure S7.** Chromatogram of the silylated Angelica root EO. Peaks at 15.6 and 30.7 min are internal standards, C:21 respective betulinol.

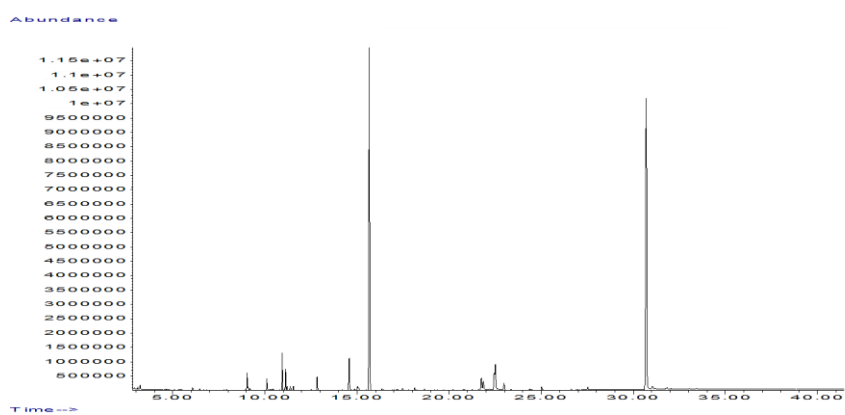

**Figure S8.** Chromatogram of the silylated Angelica root scCO<sub>2</sub> extract. Peaks at 15.6 and 30.7 min are internal standards, C:21 respective betulinol.

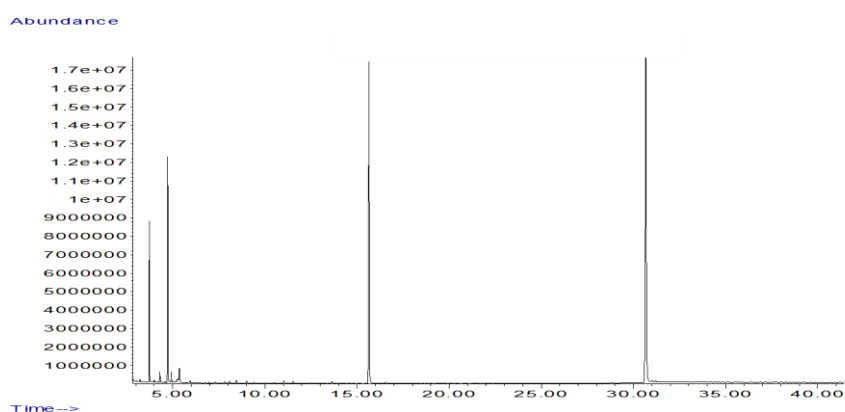

**Figure S9.** Chromatogram of the silylated marsh Labrador tea EO. Peaks at 15.6 and 30.7 min are internal standards, C:21 respective betulinol.

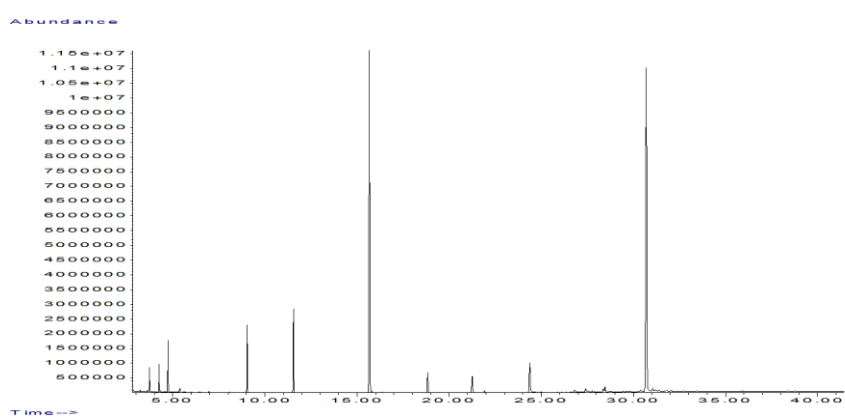

**Figure S10.** Chromatogram of the silylated marsh Labrador tea main scCO<sub>2</sub> extract. Peaks at 15.6 and 30.7 min are internal standards, C:21 respective betulinol.

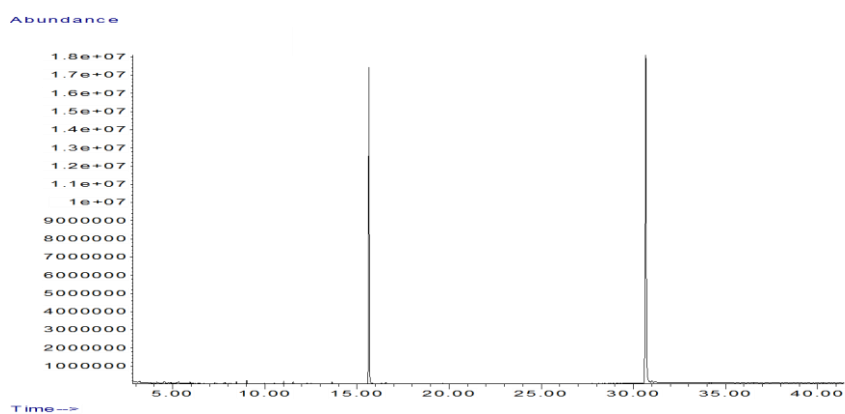

**Figure S11.** Chromatogram of the silylated common tansy inflorescence EO. Peaks at 15.6 and 30.7 min are internal standards, C:21 respective betulinol.

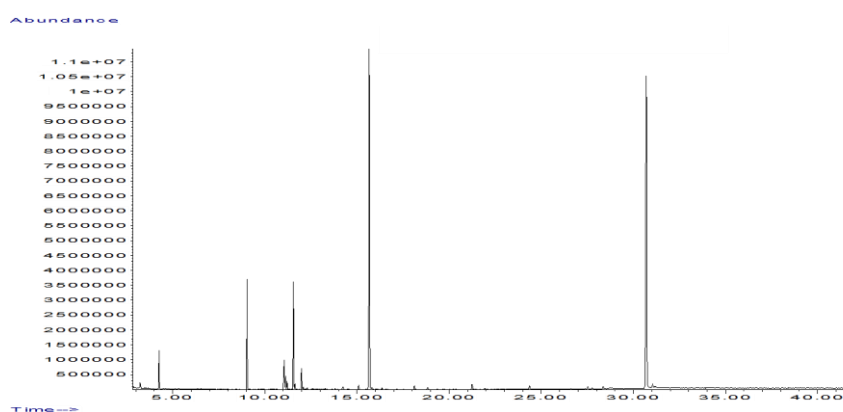

**Figure S12.** Chromatogram of the silylated common tansy inflorescence scCO<sub>2</sub> extract. Peaks at 15.6 and 30.7 min are internal standards, C:21 respective betulinol.

Fragmentation patterns of selected main compounds are shown in Figures S13–S44. Red bars indicate the unknown peak and blue bars indicate the compound found in the library.

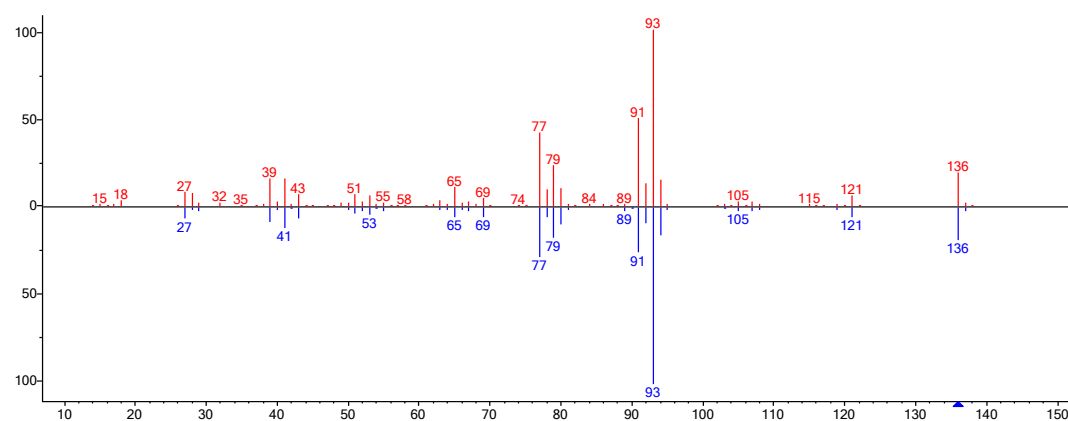

**Figure S13.** Fragmentation pattern of  $\beta$ -phellandrene found in Angelica root EO.

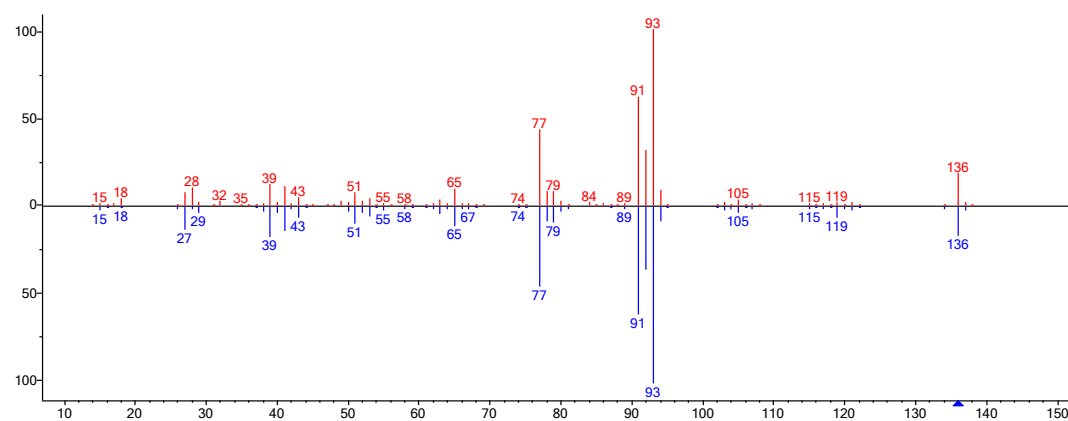

**Figure S14.** Fragmentation pattern of  $\alpha$ -phellandrene found in Angelica root EO.

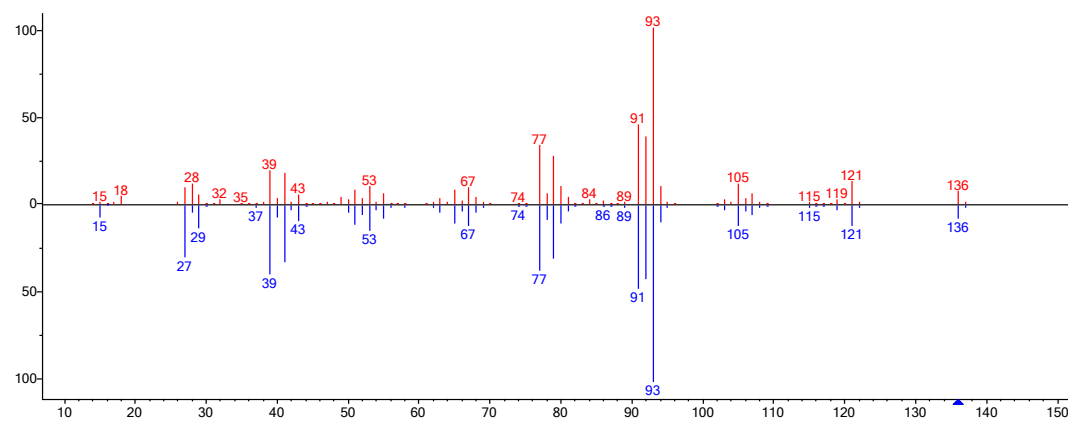

**Figure S15.** Fragmentation pattern of  $\alpha$ -pinene found in Angelica root EO and common tansy inflorescence EO.

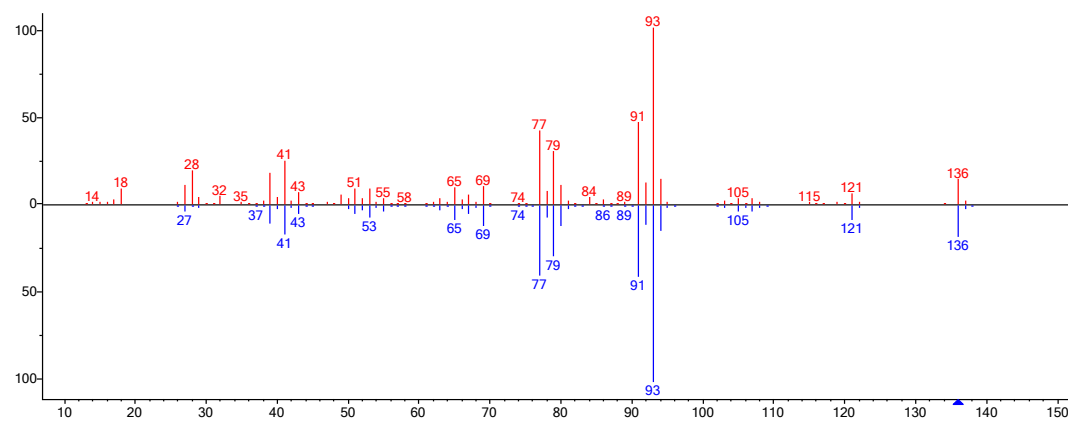

**Figure S16.** Fragmentation pattern of sabinene found in Angelica root EO, common tansy inflorescence EO and scCO<sub>2</sub> extracts.

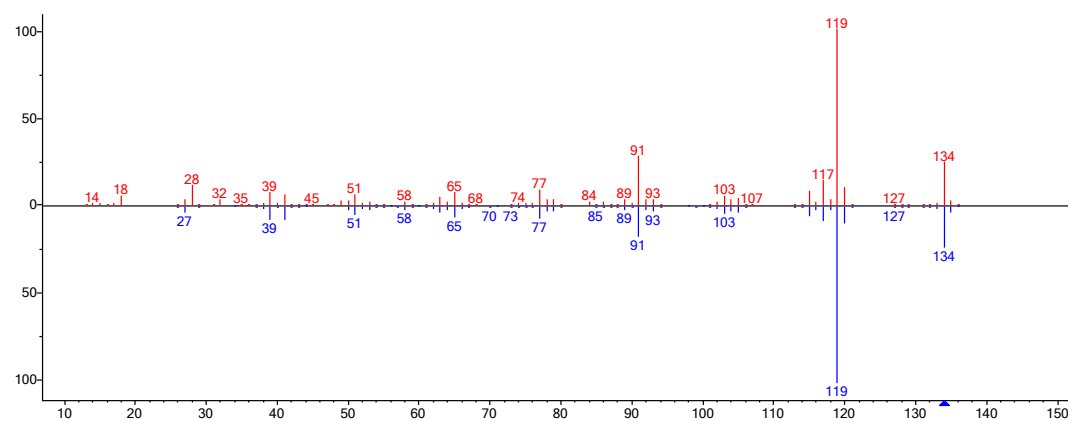

**Figure S17.** Fragmentation pattern of *p*-cymene found in Angelica root EO, scCO<sub>2</sub> extract and common tansy inflorescence EO.

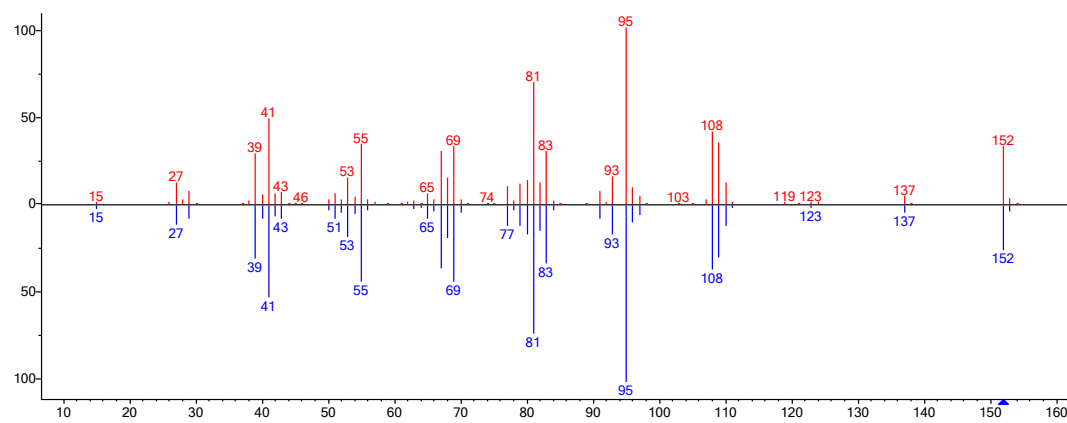

Figure S18. Fragmentation pattern of camphor found in Angelica root EO and scCO<sub>2</sub> extract.

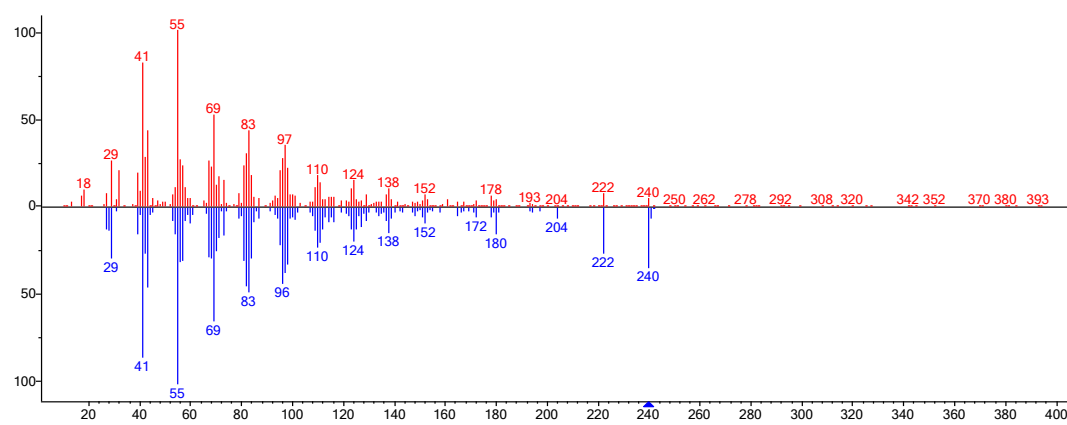

Figure S19. Fragmentation pattern of pentadecalactone found in Angelica root scCO<sub>2</sub> extract.

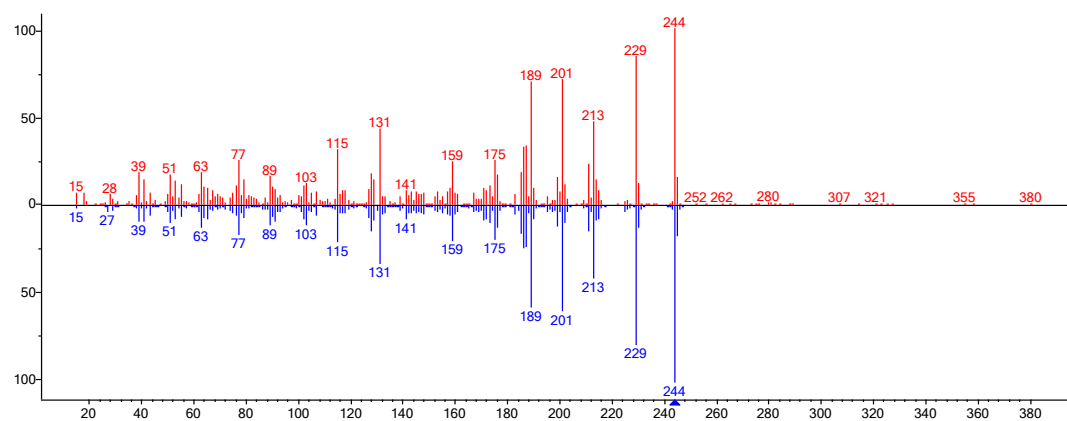

Figure S20. Fragmentation pattern of osthole found in Angelica root scCO<sub>2</sub> extract.

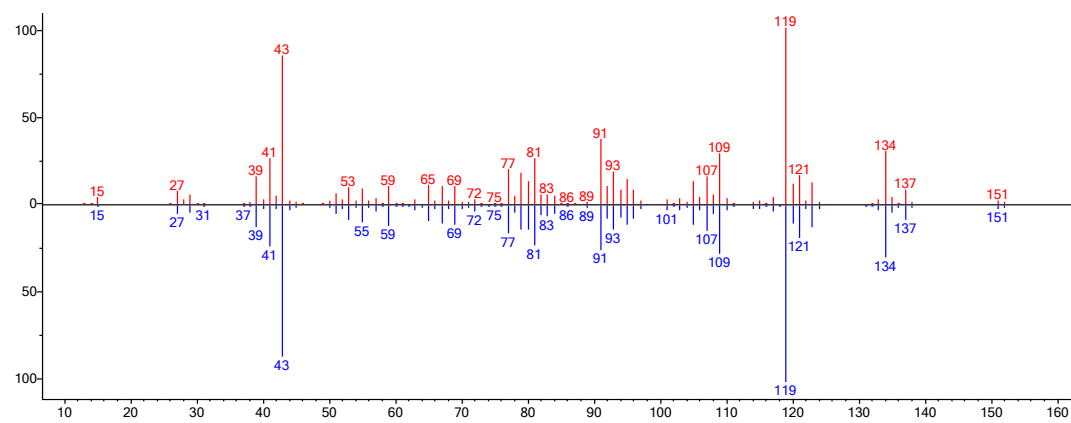

**Figure S21.** Fragmentation pattern of trans-chrysanthenyl acetate found in Angelica root scCO<sub>2</sub> extract, common tansy inflorescence EO and scCO<sub>2</sub> extracts.

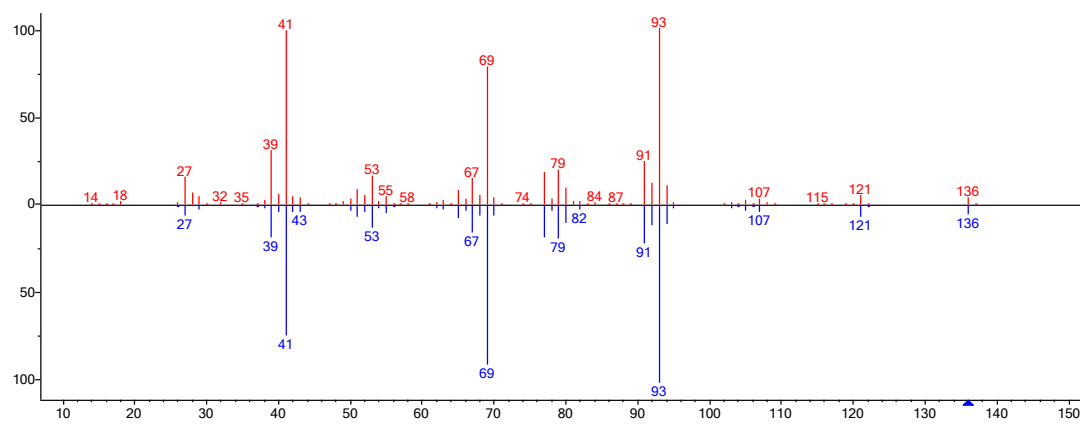

**Figure S22.** Fragmentation pattern of β-myrcene found in marsh Labrador tea EO.

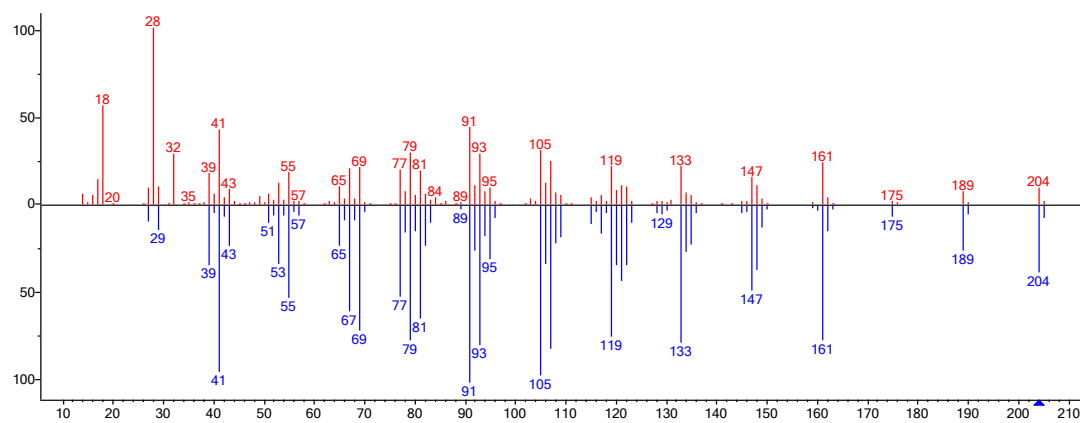

**Figure S23.** Fragmentation pattern of 9-epi-β-caryophyllene found in marsh Labrador tea EO and scCO<sub>2</sub> extracts.



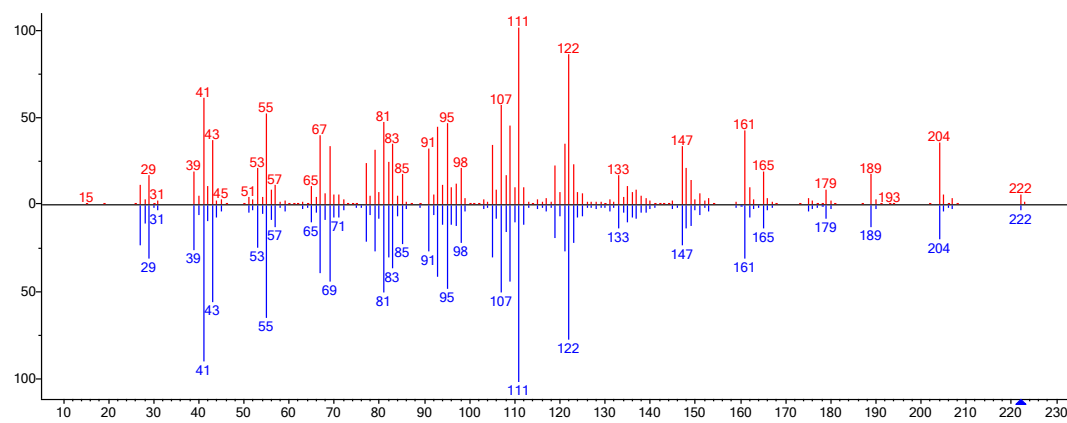

Figure S24. Fragmentation pattern of palustrol found in marsh Labrador tea EO and scCO<sub>2</sub> extracts.

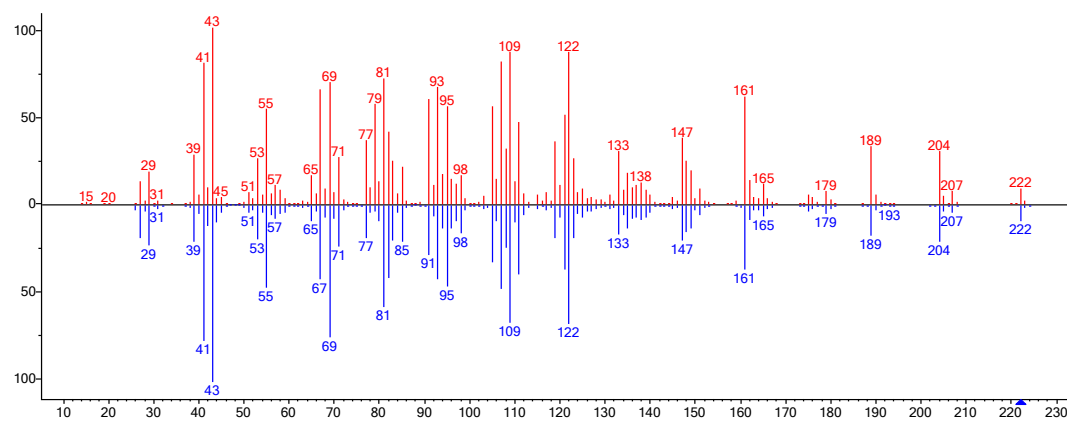

Figure S25. Fragmentation pattern of ledol found in marsh Labrador tea EO and scCO<sub>2</sub> extracts.

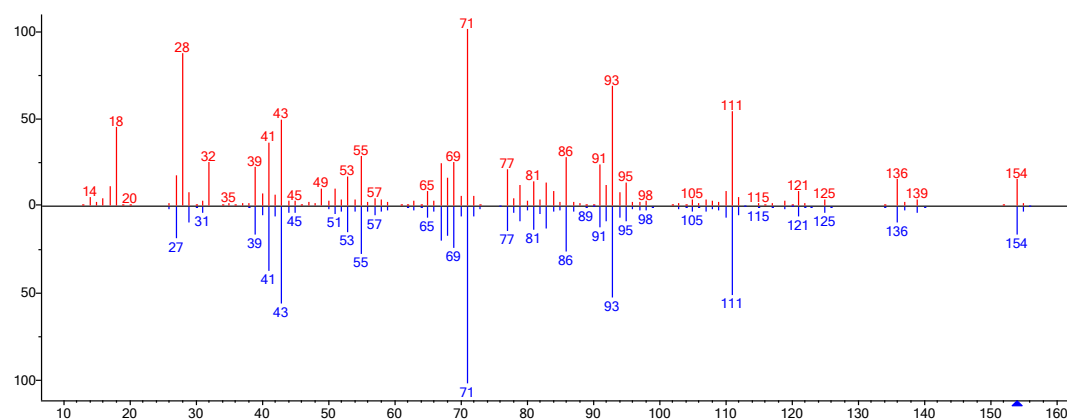

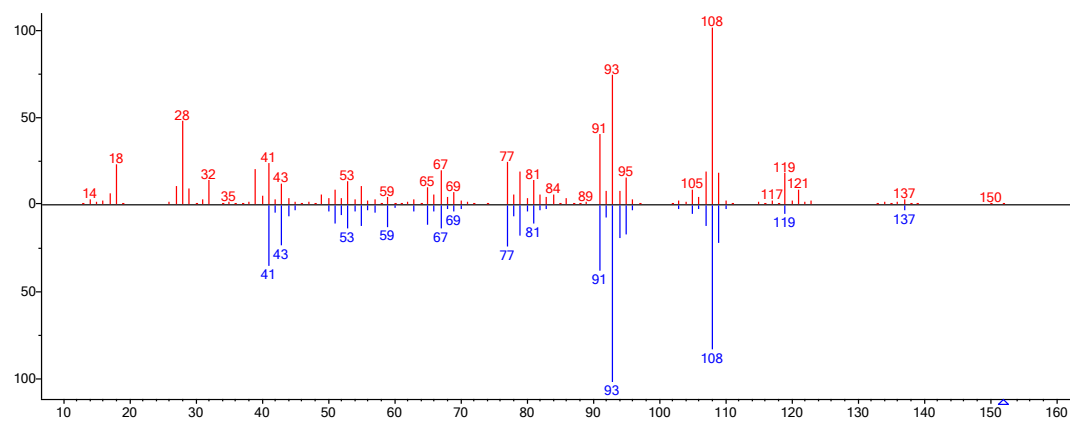

**Figure S27.** Fragmentation pattern of camphen-6-ol found in common tansy inflorescence EO and scCO<sub>2</sub> extracts.

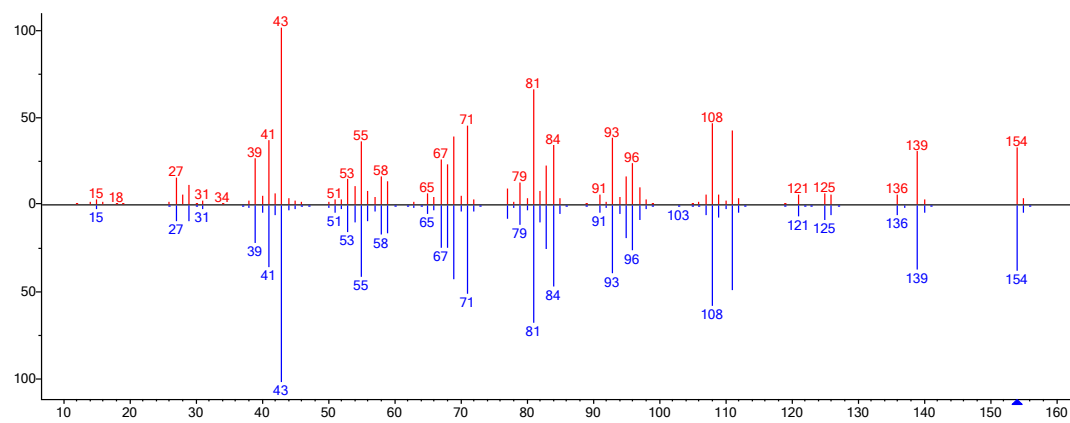

**Figure S28.** Fragmentation pattern of eucalyptol (*syn.* 1,8-cineole) found in common tansy inflorescence EO and scCO<sub>2</sub> extracts.

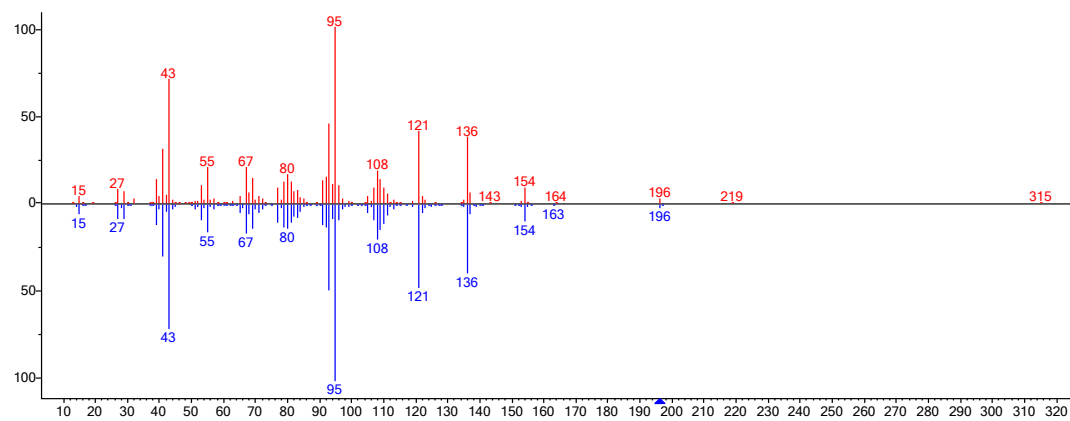

**Figure S29.** Fragmentation pattern of bornyl acetate found in Angelica root EO, common tansy inflorescence EO and scCO<sub>2</sub> extracts.

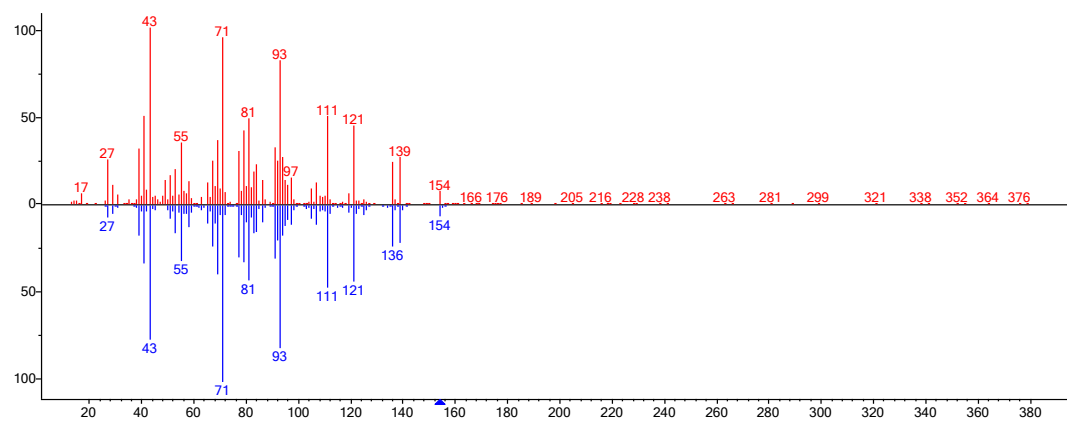

**Figure S30.** Fragmentation pattern of cis-sabinene hydrate found in common tansy inflorescence EO.

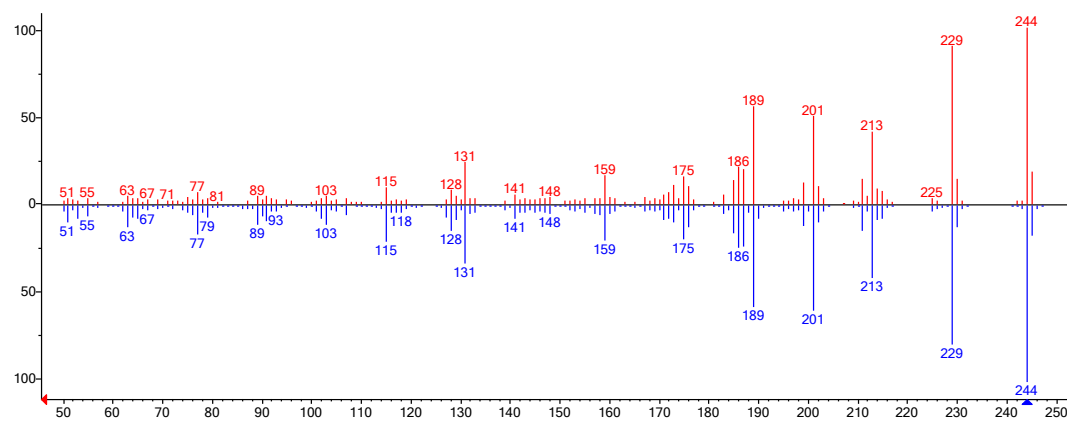

**Figure S31.** Fragmentation pattern of osthole, trimethylsilyl (TMS) derivate found in silylated Angelica root scCO<sub>2</sub> extract.

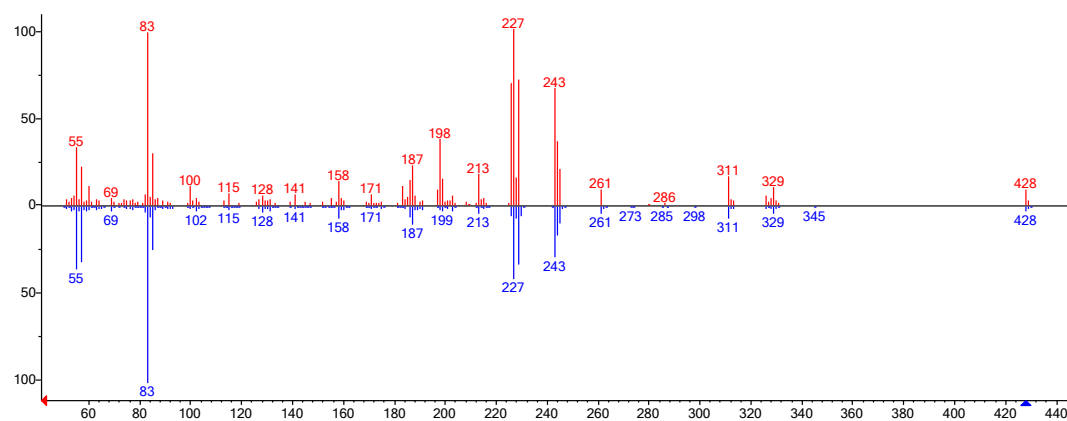

**Figure S32.** Fragmentation pattern of 2'-angeloyl-3'-isovaleryl vaginate, TMS derivate found in silylated Angelica root scCO<sub>2</sub> extract.

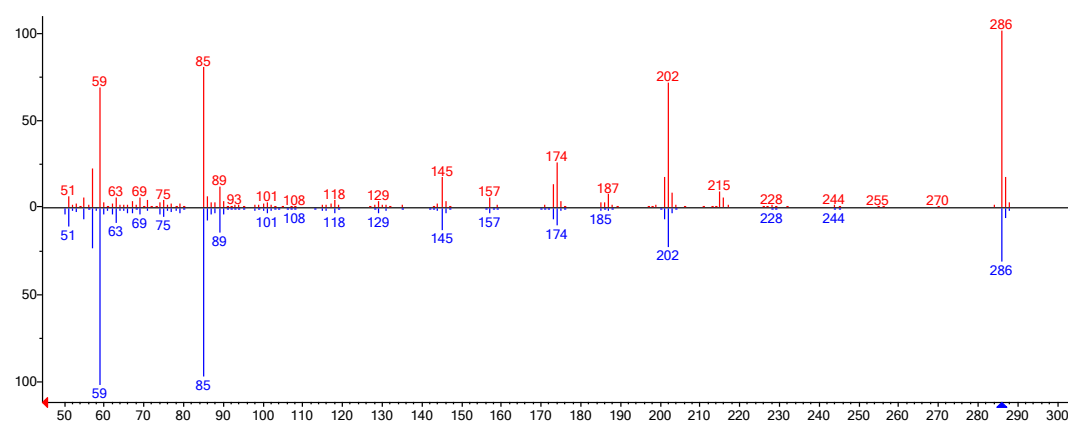

**Figure S33.** Fragmentation pattern of oxypeucedanin, TMS derivate found in silylated Angelica root scCO<sub>2</sub> extract.

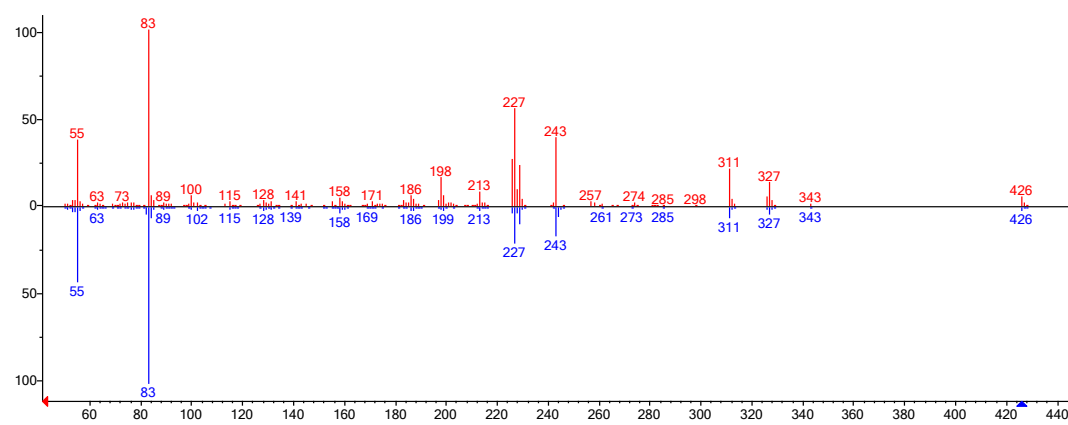

**Figure S34.** Fragmentation pattern of archangelicin, TMS derivate found in silylated Angelica root scCO<sub>2</sub> extract.

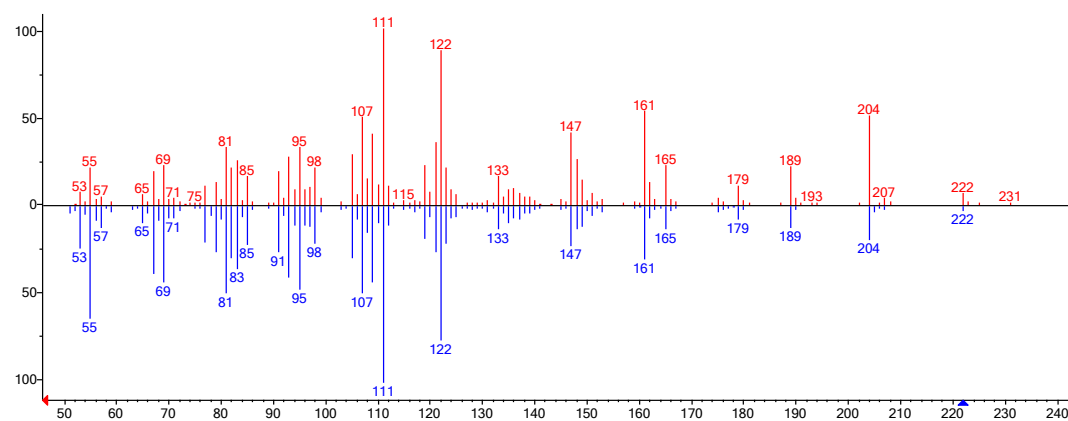

**Figure S35.** Fragmentation pattern of palustrol, TMS derivate found in silylated marsh Labrador tea EO and scCO<sub>2</sub> extracts.

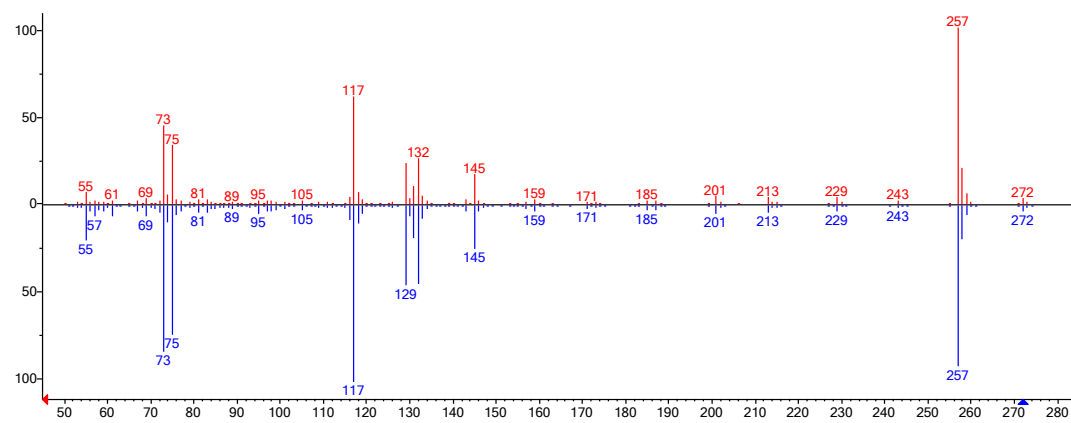

**Figure S36.** Fragmentation pattern of lauric acid, TMS derivate found in silylated marsh Labrador tea EO, scCO<sub>2</sub> extracts, common tansy inflorescence EO and scCO<sub>2</sub> extracts.

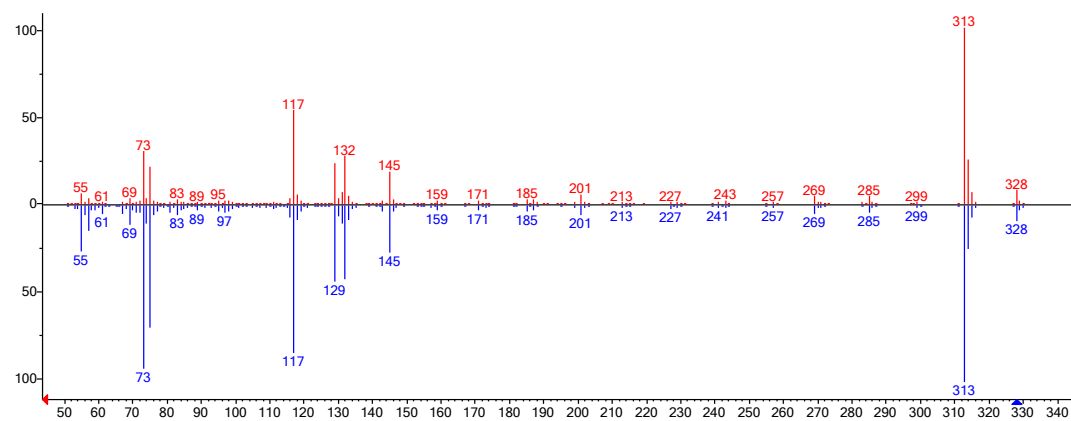

**Figure S37.** Fragmentation pattern of palmitic acid, TMS derivate found in silylated Angelica root EO, scCO<sub>2</sub> extract, marsh Labrador tea EO, scCO<sub>2</sub> extracts, common tansy inflorescence EO and scCO<sub>2</sub> extracts.

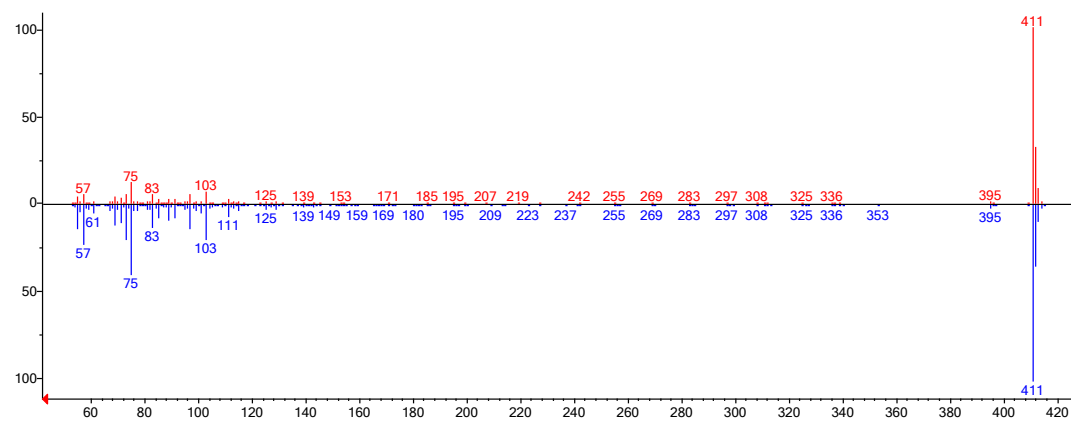

**Figure S38.** Fragmentation pattern of alcohol 24:0, TMS derivate found in silylated marsh Labrador tea scCO<sub>2</sub> extracts and common tansy inflorescence scCO<sub>2</sub> extracts.

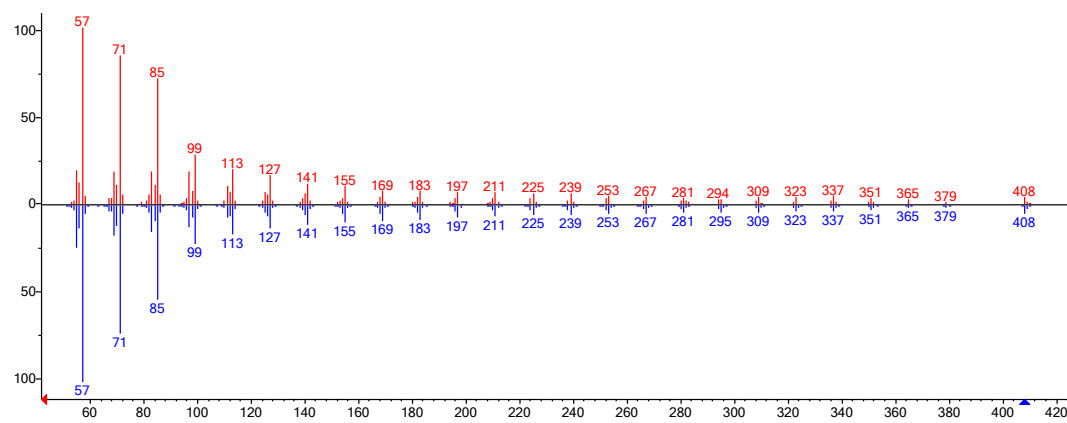

**Figure S39.** Fragmentation pattern of n-nonacosane found in silylated marsh Labrador tea scCO<sub>2</sub> extracts and common tansy inflorescence scCO<sub>2</sub> extracts.

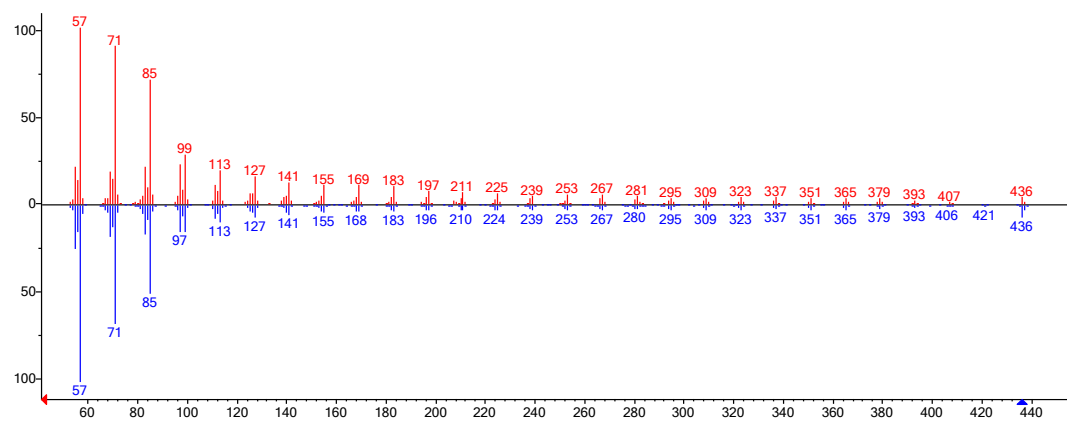

**Figure S40.** Fragmentation pattern of hentriacontane found in silylated marsh Labrador tea scCO<sub>2</sub> extracts and common tansy inflorescence scCO<sub>2</sub> extracts.

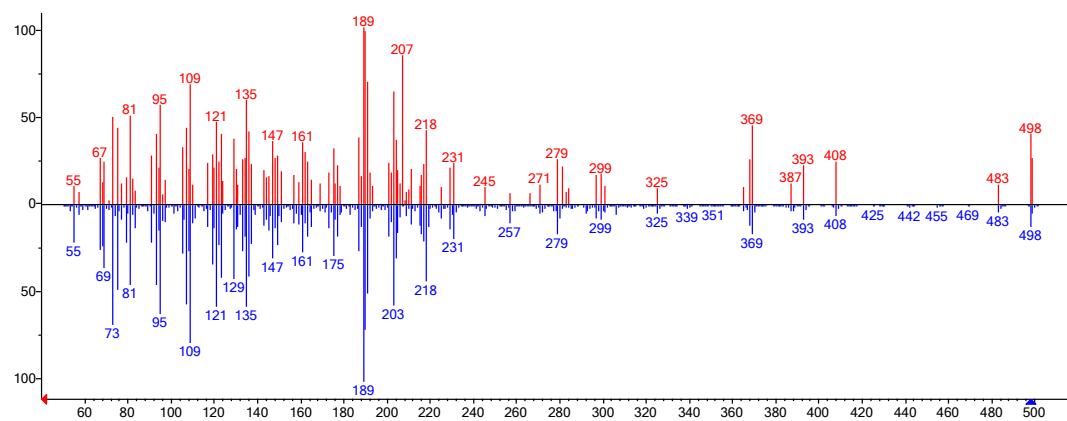

**Figure S41.** Fragmentation pattern of lupeol, TMS derivative found in silylated marsh Labrador tea scCO<sub>2</sub> extracts.

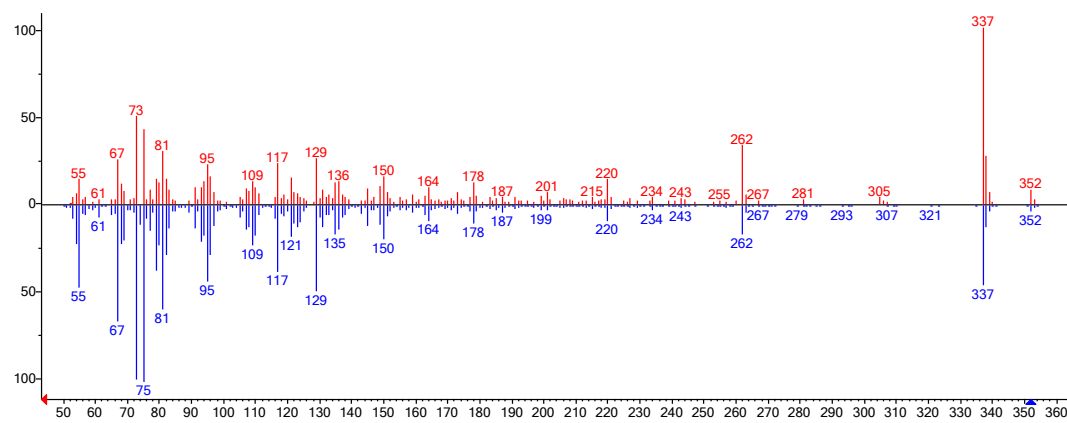

**Figure S42.** Fragmentation pattern of linoleic acid, TMS derivative found in silylated Angelica root scCO<sub>2</sub> extract and common tansy inflorescence scCO<sub>2</sub> extracts.

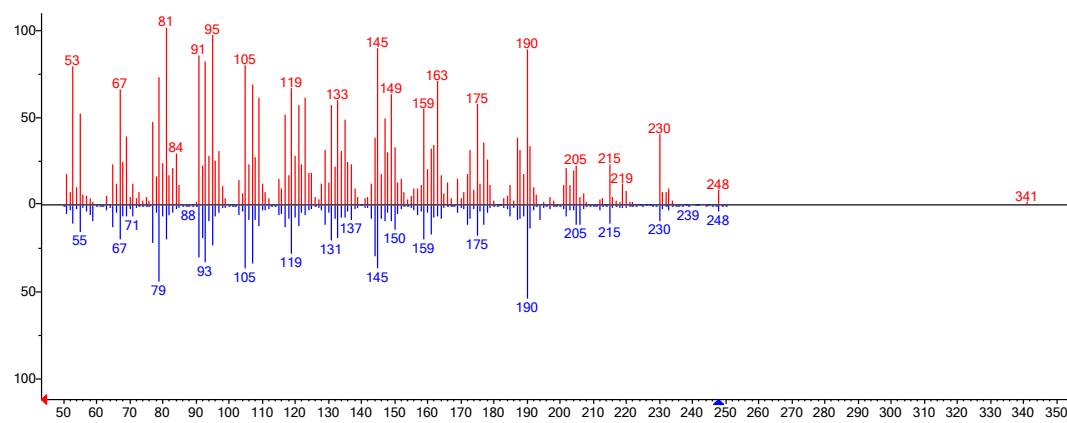

**Figure S43.** Fragmentation pattern of parthenolide, TMS derivative found in silylated common tansy inflorescence scCO<sub>2</sub> extracts.

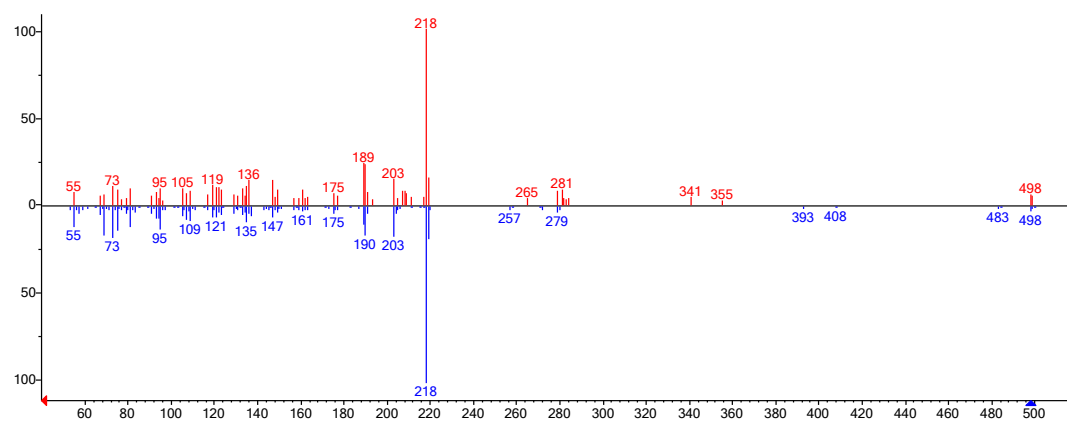

**Figure S44.** Fragmentation pattern of  $\beta$ -amyrin, TMS derivative found in silylated marsh Labrador tea scCO<sub>2</sub> extracts and common tansy inflorescence scCO<sub>2</sub> extracts.
